# Supplementary material
Source: HighWire-hosted journal article supplement (https://cmajopen-stage.highwire.org/highwire/filestream/81038/field_highwire_adjunct_files/0/open-2016-0142-1-at.pdf)
Supplement: open-2016-0142-1-at.pdf [file open-2016-0142-1-at.pdf]

## Appendix 1 (as supplied by the authors): The Home Metrics Survey Completed by Test Participants:

This online survey was hosted on a secure website with participant personal information (name, address, etc.) collected directly by Canadian National Radon Proficiency Program professionals and kept secure and confidential.

To sign up now please complete the following form.

### Citizen Scientist Survey Sheet

#### 1. CONTACT AND BUILDING FOR DETECTOR PLACEMENT

Contact First Name \*

Contact Last Name \*

Email address \*

Phone number \*

 -  -   
### ### ####

For the Building, do you (check all that apply): \*

- ☐ Own ☐ Rent ☐ Work  
☐ Live ☐ Live ☐ Other (specify below)

Building Address \*

(Street, City, Postal Code)

Mailing Address of Contact (if different from Building Address)

(Street, City, Postal Code)

#### 2. DETECTOR PLACEMENT DETAILS

Will you be able to place the detector as per video instructions? \*

- ☐ Yes  
☐ No - please specify:

What floor will the detector be placed on? \*

- ☐ Basement  
☐ Main  
☐ Second  
☐ Third  
☐ Other (specify below)

#### 3. BUILDING

Type of home

- ☐ Single Detached - Bungalow ☐ Single Detached - Split-Level  
☐ Single Detached - 2-Story ☐ Single Detached - 3-Story  
☐ Semi-detached - Side by Side ☐ Semi-detached - Row House  
☐ Semi-detached - Duplex ☐ Semi-detached - Townhouse  
☐ Trailer/Mobile Home ☐ Other - (specify below)

Year Constructed \*

Number of Stories (incl. basement) \*

Heating Fuel Type (check all that apply) \*

- ☐ Natural Gas ☐ Propane  
☐ Oil ☐ Wood  
☐ Electric ☐ Don't Know

Heat Delivery System (check all that apply) \*

- ☐ Furnace ☐ Stove  
☐ Hydronic/Radiant Water ☐ Heat Pump  
☐ Baseboard ☐ Fireplace  
☐ Heat Recovery Ventilator ☐ Don't Know

---

#### 4. GROUND FLOOR CHARACTERISTICS

##### Basement or lowest ground level type (check all that apply) \*

- |                                                  |                                      |                                             |
|--------------------------------------------------|--------------------------------------|---------------------------------------------|
| <input type="checkbox"/> Finished                | <input type="checkbox"/> Unfinished  | <input type="checkbox"/> Partially Finished |
| <input type="checkbox"/> Crawl Space             | <input type="checkbox"/> Concrete    | <input type="checkbox"/> Concrete           |
| <input type="checkbox"/> Open Ground             | <input type="checkbox"/> No Basement | <input type="checkbox"/> Don't Know         |
| <input type="checkbox"/> Other – (specify below) |                                      |                                             |

##### What types of openings are in the basement? (check all that apply) \*

- ☐ Sump
- ☐ Drain
- ☐ Cracks around foundation walls
- ☐ Humidify/air condition drain
- ☐ Gap in foundation
- ☐ Various Cracks
- ☐ Bath/Kitchen Fan
- ☐ Water Supply
- ☐ Dryer
- ☐ Furnace
- ☐ Stairs
- ☐ Other – (specify below)

##### Is there plumbing in the basement/crawlspace? \*

- ☐ Yes
- ☐ No
- ☐ N/A

##### Type of slab on grade floor of basement/crawlspace? \*

- ☐ Indoor Parking
- ☐ Poured Concrete
- ☐ Earth/dirt
- ☐ Rock
- ☐ Other – (specify below)

##### Type of foundation walls? \*

- ☐ Poured Concrete
- ☐ Cinder Block
- ☐ Brick
- ☐ Stone
- ☐ Wood
- ☐ Don't Know
- ☐ Other (specify):

---

---

## 5. MOTIVATION AND INTENTION

If the detector shows a high radon level inside your home, do you intend to reduce that level? \*

- ☐ Yes  
☐ No  
☐ Maybe

Indicate reasons that caused you to test your building or want to test initially (check all that apply) \*

- ☐ Research Project  
☐ Doctor's suggestion  
☐ Buying the building  
☐ Selling the building, thought it was a good idea  
☐ Selling the building, buyer asked for it to be done  
☐ Read an article about radon  
☐ Attended a public information session  
☐ Concern for children  
☐ Renovating anyway  
☐ Friend's suggestion  
☐ Other Radon Program  
☐ Other – (specify below)

---

## 6. PAST RADON MITIGATION

Complete only if you are aware of a radon mitigation which has been done to the building

Date of Last Work (e.g. Nov / 27 / 2013)

/  /    
MM DD YYYY

Cost of Work

\$   
Dollars

Do you know the radon concentration prior to work done

- ☐ No – I didn't test  
☐ No – I tested but am unsure of the results  
☐ Yes – Please indicate amount below in Bq/m3

Who performed the work? (check one only)

- ☐ Homeowner  
☐ C-NRPP Certified Mitigator  
☐ Local Handyman  
☐ Builder During Construction  
☐ Friend / Relative  
☐ Other Professional

Was a permit issued for this work?

- ☐ Yes  
☐ No  
☐ Unsure

Type of Radon Mitigation (check all that apply)

- ☐ Fill some foundation cracks/holes  
☐ Fill all foundation cracks/holes  
☐ Seal sump/drain/membrane(s)  
☐ Crawlspace/membrane depressurization  
☐ Active SSD  
☐ Passive SSD  
☐ Roof discharge  
☐ Fan added to passive SSD  
☐ Ventilation  
☐ Installed during construction  
☐ Capped pipe  
☐ Don't know

If system is now active SSD, where is the fan?

- ☐ Fan in basement  
☐ Fan in attic  
☐ Fan in garage  
☐ Fan outdoors

Was a contractor used

- ☐ Yes  
☐ No  
☐ Don't Know
